# Supplementary material
Source: ML conference proceedings conference paper supplement (https://openaccess.thecvf.com/content/CVPR_2020/html/Shi_Fast_Texture_Synthesis_CVPR_2020_paper.html)
Supplement: Supplementary file 1 [file Shi_Fast_Texture_Synthesis_CVPR_2020_supplemental.pdf]

# Supplementary Material for Fast Texture Synthesis via Pseudo Optimizer

Wu Shi    Yu Qiao

ShenZhen Key Lab of Computer Vision and Pattern Recognition,  
SIAT-SenseTime Joint Lab, Shenzhen Institutes of Advanced Technology, Chinese Academy of Sciences  
SIAT Branch, Shenzhen Institute of Artificial Intelligence and Robotics for Society

wu.shi@siat.ac.cn    yu.qiao@siat.ac.cn

## 1. Details of Unfolding Optimization Loop

In this section, we go into detail about unfolding optimization loop. As mentioned in the main paper, one optimization step of [2] consists of two steps: (1) computing the gradient of texture loss with respect to the input, and (2) refining the gradient using the optimizer.

**Computing the gradient** The step (1) is an evaluation of the forward and backward propagation of the descriptive network, VGG19 [4]. The backward computation can be implemented by components, such as transposed convolutional layers, gated layers and tiled layers, in most deep learning frameworks.

**Refining the gradient** Unfolding the step (2) depends on the choice of optimizers. For *Stochastic Gradient Descent* (SGD), the optimizer is simply an addition of the gradient (scaled by the learning rate) and the input. For more advanced methods like Adam [3] and L-BFGS [5], the computation is more complex but still can be implemented by basic arithmetics.

- Adam keeps the moving average elementwise first-order and second-order statistics of the gradients and computes the adaptive learning rate for each parameter. The computation of refined gradient  $\Delta x$  is defined as follows:

$$\begin{aligned} g_t &= \nabla_x \mathcal{L}_{tex}(x_t, \tilde{x}), \\ m_t &= \beta_1 \cdot m_{t-1} + (1 - \beta_1) \cdot g_t, \\ \hat{m}_t &= m_t / (1 - \beta_1^t), \\ v_t &= \beta_2 \cdot v_{t-1} + (1 - \beta_2) \cdot g_t^2, \\ \hat{v}_t &= v_t / (1 - \beta_2^t), \\ \Delta x_t &= -\alpha \cdot \hat{m}_t / (\sqrt{\hat{v}_t} + \epsilon), \end{aligned} \quad (1)$$

where  $\beta_1, \beta_2, \alpha, \epsilon$  are constant hyperparameters. The computation of moving average statistics can be implemented by a composite layer like BatchNorm.

- L-BFGS is a Quasi-Newton optimization method. It starts with an estimate of the optimal solution,  $x_0$ , and refines the estimate iteratively based on the history of gradients and updates. The computation of descent direction is defined as follows:

$$\begin{aligned} g_t &= \nabla_x \mathcal{L}_{tex}(x_t, \tilde{x}), \\ s_t &= x_{t+1} - x_t, \\ y_t &= g_{t+1} - g_t, \\ \rho_t &= 1 / (y_t^T s_t), \\ H_{t+1} &= (I - \rho_t s_t y_t^T) H_t (I - \rho_t y_t s_t^T) + \rho_t s_t s_t^T, \\ z_t &= H_t g_t. \end{aligned} \quad (2)$$

The inverse Hessian is not calculated explicitly. Instead, the search direction,  $z_t$ , is computed iteratively from the history of  $g_t, s_t$  and  $y_t$ . The scaling of the descent direction is determined by a line search method, which can be implemented by a conditional loop in a deep learning framework. The step length of 1 is often accepted in most iterations.

Therefore, both steps of (1) and (2) can be implemented by a feed-forward network and some additional arithmetic operations depending on the optimizer. The whole optimization process simply repeats the step for hundreds of times and finally derives a long computational graph.

## 2. More Experimental Results

We show more synthesized texture images using our method in Figure 1, 2, 3, 4, 5 and 6.

## 3. Extended Objective Function

We show synthesized texture images using our method with objective functions of [1] in Figure 7.



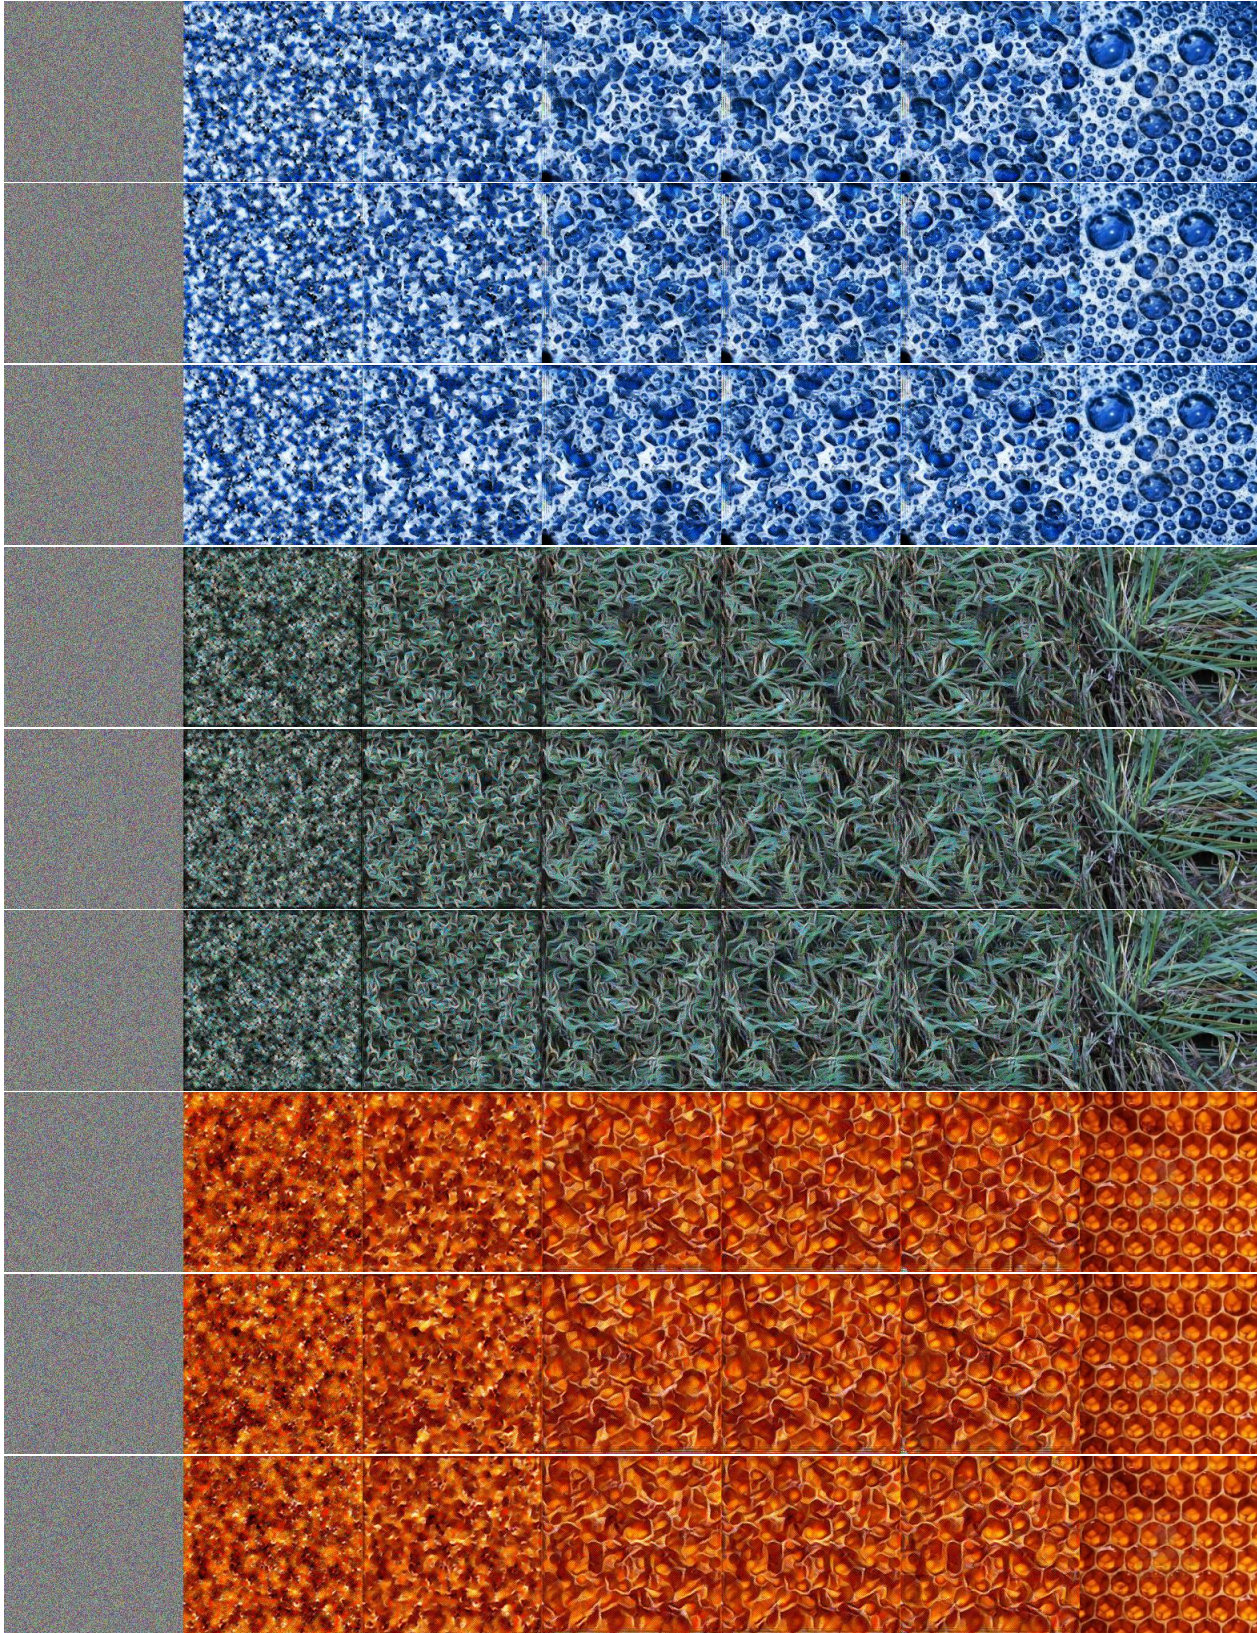

Figure 1. Results of ProPO. The leftmost column contains the input noise images  $x^{[0]} \sim Z$ . The rightmost column contains the target texture images  $\tilde{x}$ . The intermediate five columns contain the results of  $x^{[1]}, x^{[2]}, x^{[3]}, x^{[4]}, x^{[5]}$  respectively. Each synthesis is repeated three times using different noise inputs.



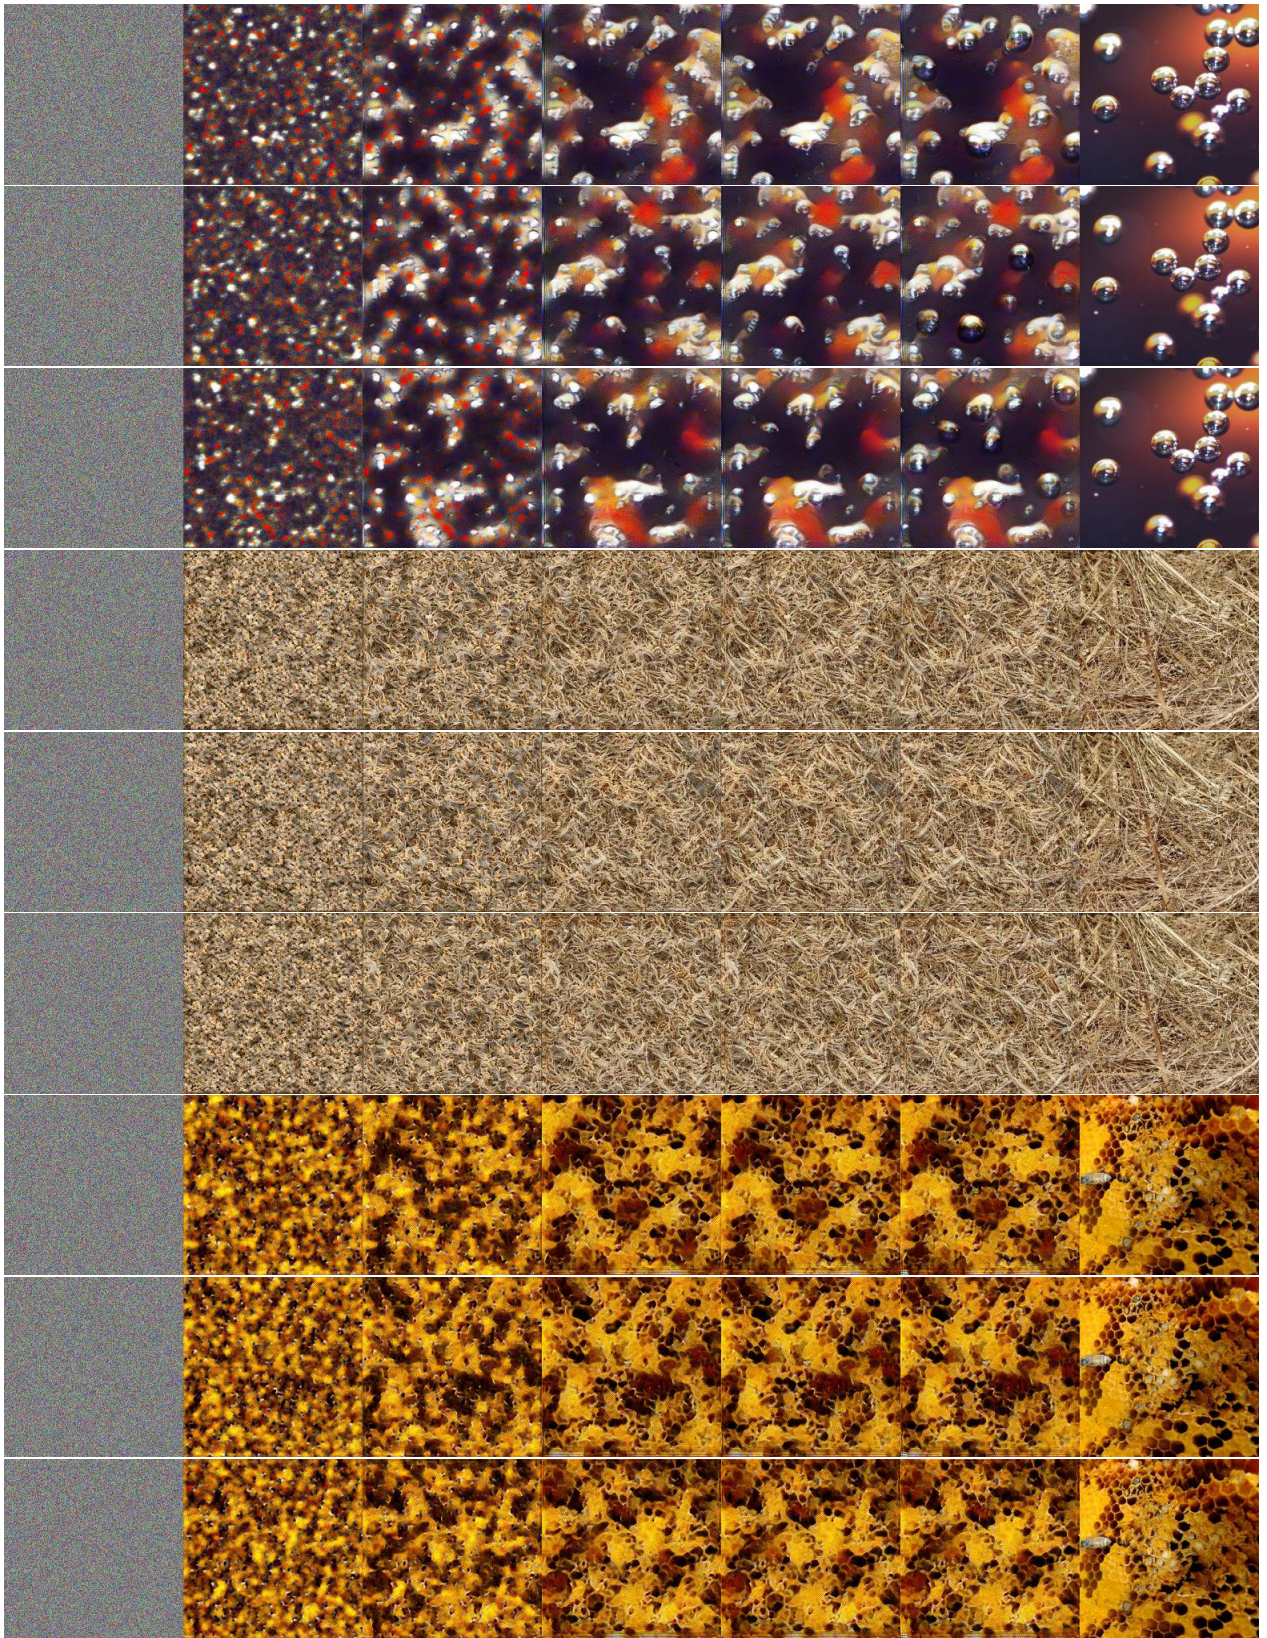

Figure 2. Results of ProPO. The leftmost column contains the input noise images  $x^{[0]} \sim Z$ . The rightmost column contains the target texture images  $\tilde{x}$ . The intermediate five columns contain the results of  $x^{[1]}, x^{[2]}, x^{[3]}, x^{[4]}, x^{[5]}$  respectively. Each synthesis is repeated three times using different noise inputs.



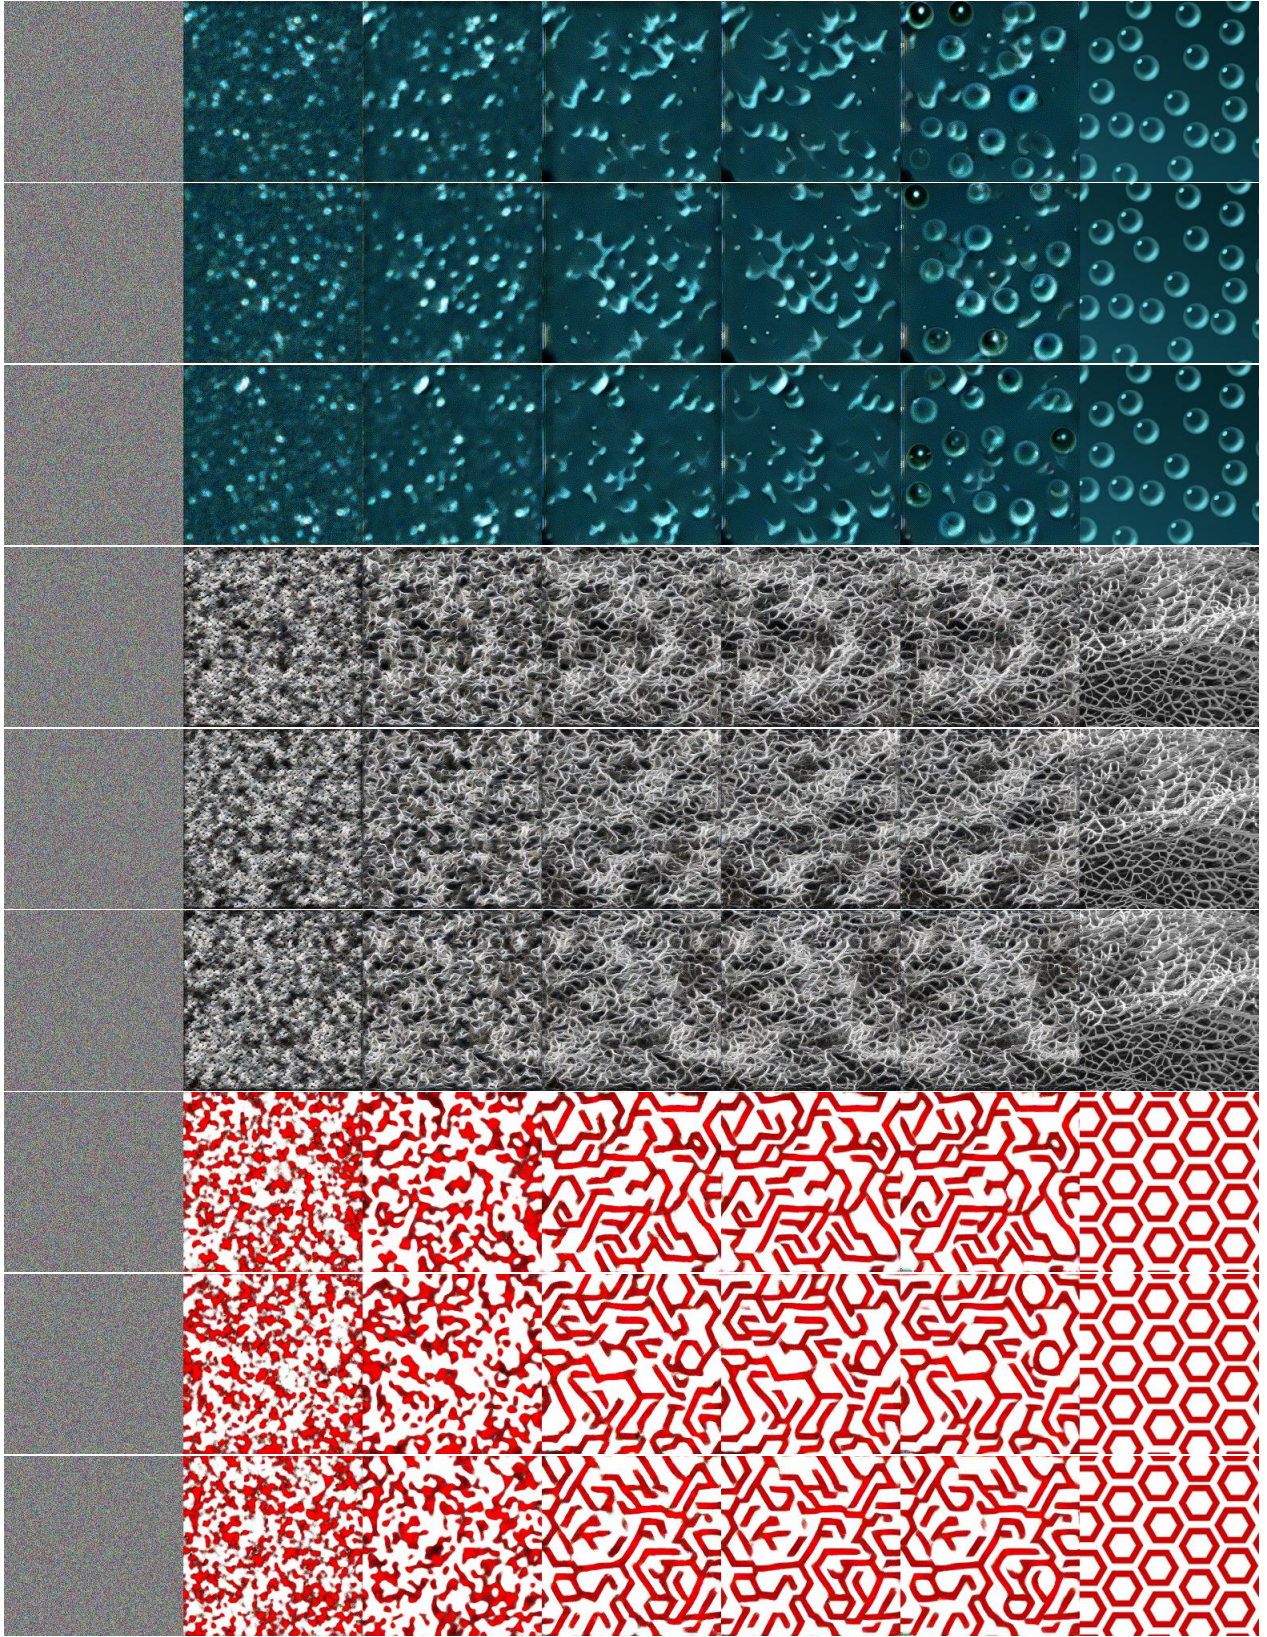

Figure 3. Results of ProPO. The leftmost column contains the input noise images  $x^{[0]} \sim Z$ . The rightmost column contains the target texture images  $\tilde{x}$ . The intermediate five columns contain the results of  $x^{[1]}, x^{[2]}, x^{[3]}, x^{[4]}, x^{[5]}$  respectively. Each synthesis is repeated three times using different noise inputs.



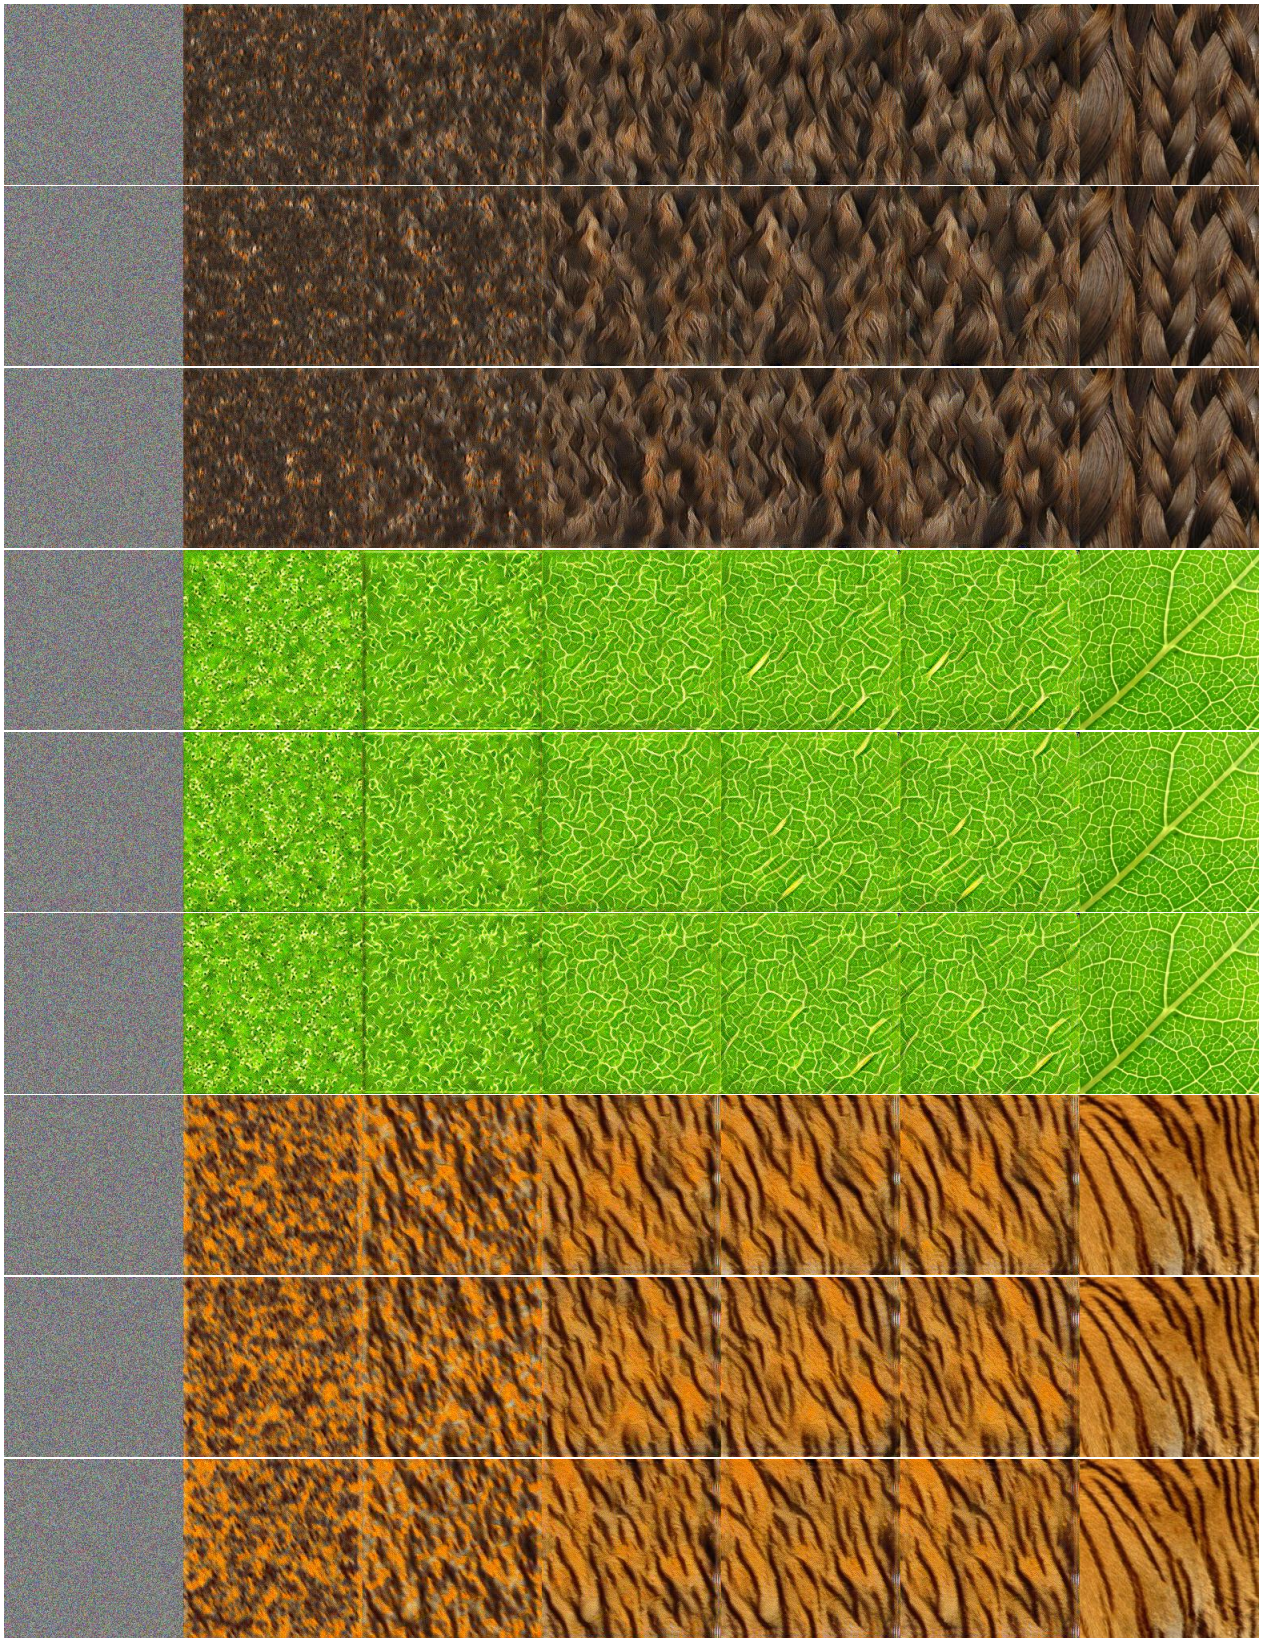

Figure 4. Results of ProPO. The leftmost column contains the input noise images  $x^{[0]} \sim Z$ . The rightmost column contains the target texture images  $\tilde{x}$ . The intermediate five columns contain the results of  $x^{[1]}, x^{[2]}, x^{[3]}, x^{[4]}, x^{[5]}$  respectively. Each synthesis is repeated three times using different noise inputs.



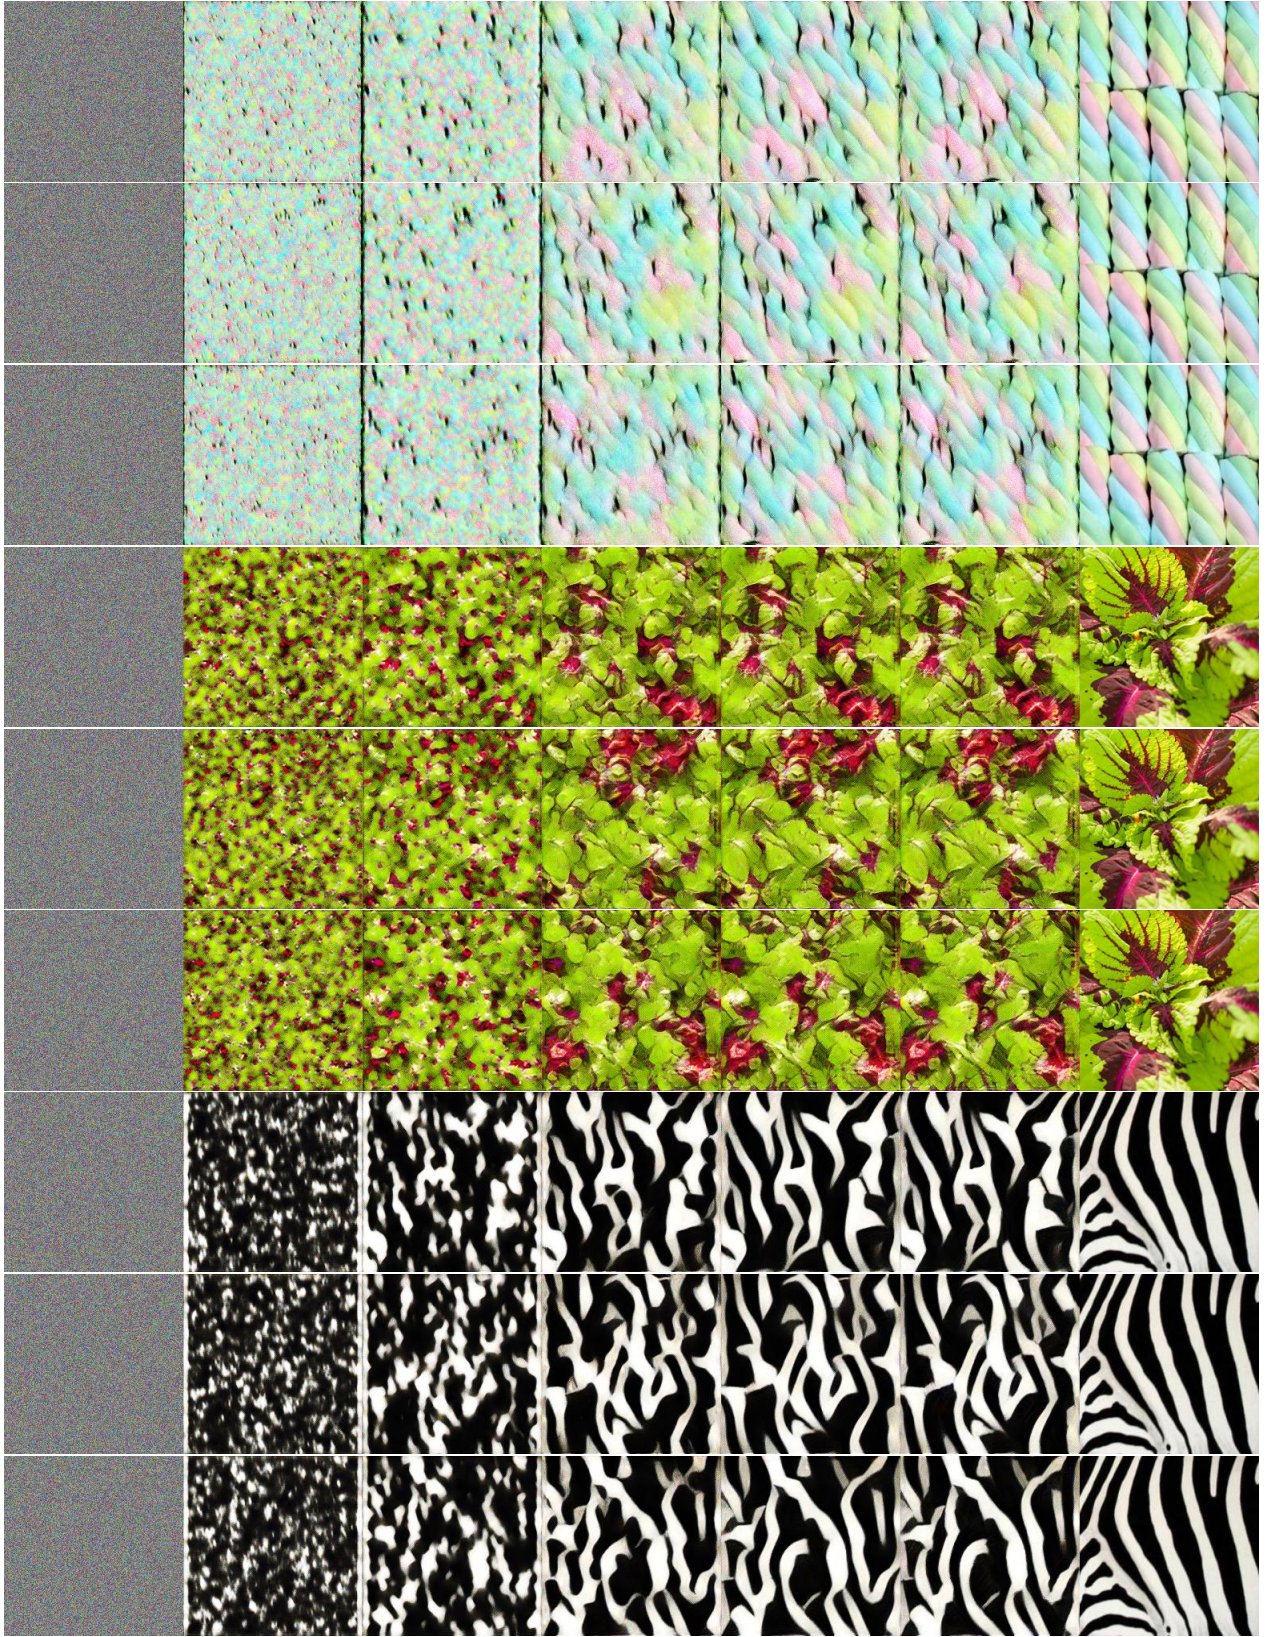

Figure 5. Results of ProPO. The leftmost column contains the input noise images  $x^{[0]} \sim Z$ . The rightmost column contains the target texture images  $\tilde{x}$ . The intermediate five columns contain the results of  $x^{[1]}, x^{[2]}, x^{[3]}, x^{[4]}, x^{[5]}$  respectively. Each synthesis is repeated three times using different noise inputs.



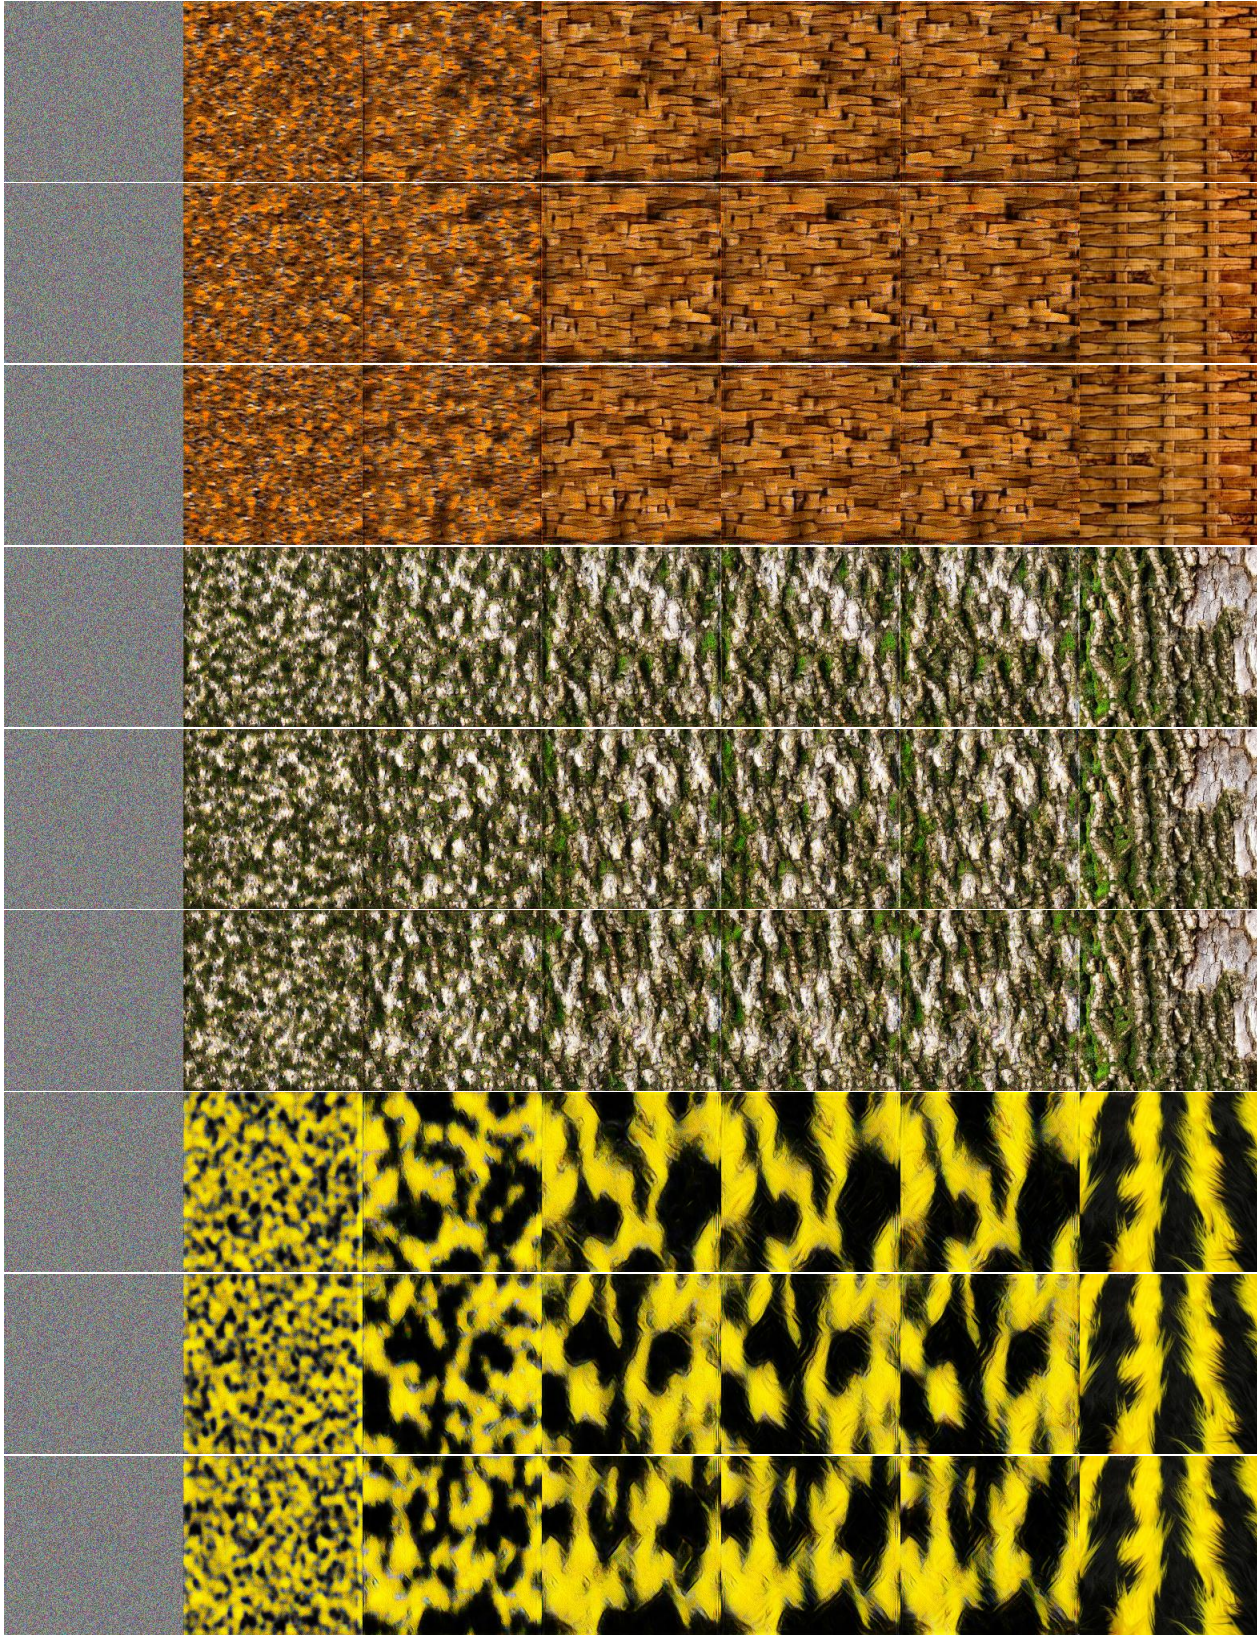

Figure 6. Results of ProPO. The leftmost column contains the input noise images  $x^{[0]} \sim Z$ . The rightmost column contains the target texture images  $\tilde{x}$ . The intermediate five columns contain the results of  $x^{[1]}, x^{[2]}, x^{[3]}, x^{[4]}, x^{[5]}$  respectively. Each synthesis is repeated three times using different noise inputs.



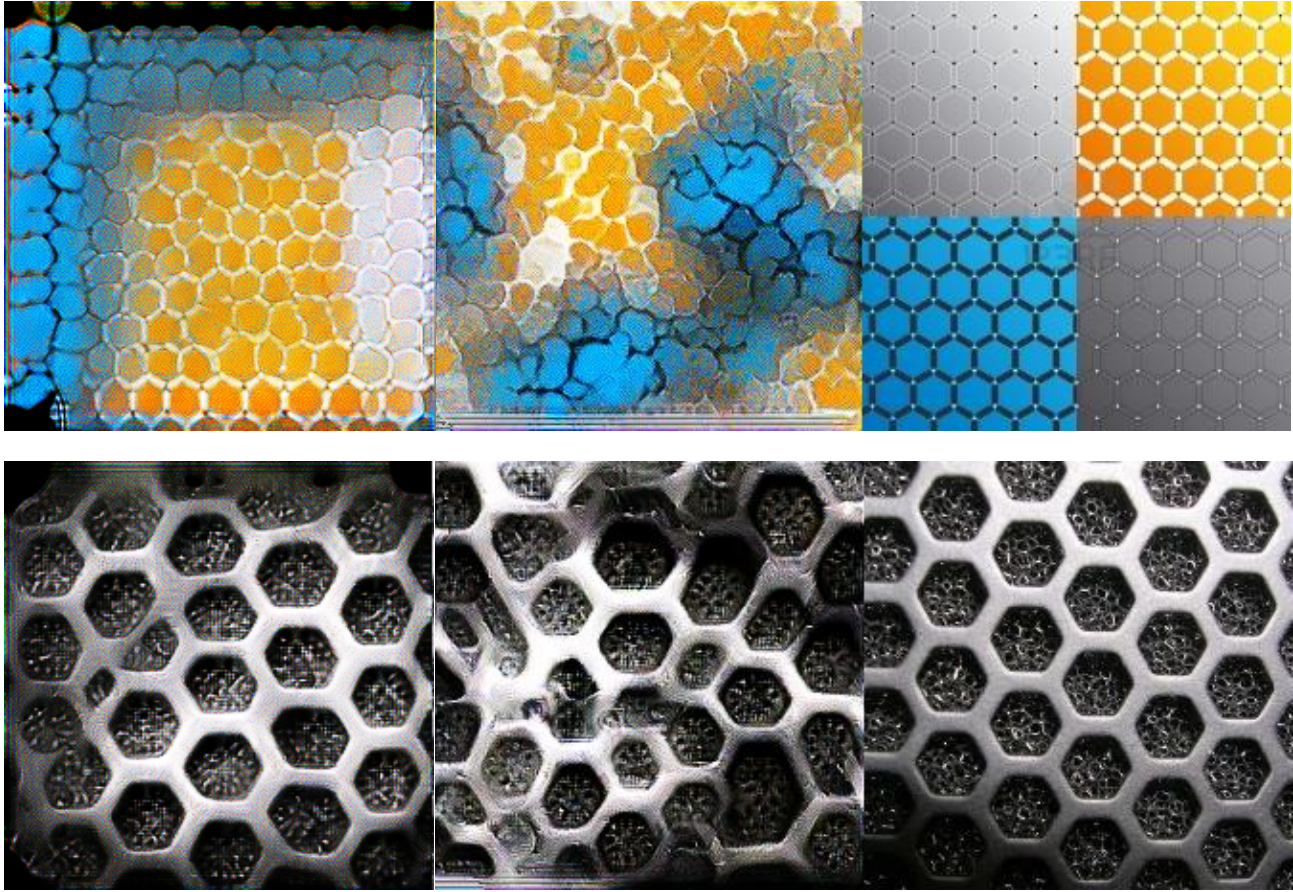

Figure 7. Results of our method (the second column) with long-range texture loss [1] (the first column).

## References

- [1] Guillaume Berger and Roland Memisevic. Incorporating long-range consistency in cnn-based texture generation. *arXiv: Computer Vision and Pattern Recognition*, 2016. 1, 8
- [2] Leon Gatys, Alexander S Ecker, and Matthias Bethge. Texture synthesis using convolutional neural networks. In *Advances in Neural Information Processing Systems 28*, pages 262–270. Curran Associates, Inc., 2015. 1
- [3] Diederik P. Kingma and Jimmy Ba. Adam: A method for stochastic optimization. In *3rd International Conference on Learning Representations, ICLR 2015, San Diego, CA, USA, May 7-9, 2015, Conference Track Proceedings*, 2015. 1
- [4] Karen Simonyan and Andrew Zisserman. Very deep convolutional networks for large-scale image recognition. *arXiv: Computer Vision and Pattern Recognition*, 2014. 1
- [5] Ciyou Zhu, Richard H. Byrd, Peihuang Lu, and Jorge Nocedal. Algorithm 778: L-bfgs-b: Fortran subroutines for large-scale bound-constrained optimization. *ACM Trans. Math. Softw.*, 23(4):550–560, Dec. 1997. 1
